# Supplementary material for: Developing Consensus Outcome Measures in Juvenile Systemic Sclerosis: A Global Survey of Pediatric Rheumatologists and Literature Review
Source: Research Square preprint supplement (doi:10.21203/rs.3.rs-5932841/v1), 2025-04-10
Supplement: Supplementary file 1 [file d255040fe98a9cadc9e86ecc.docx]

**Additional Files**

**I - Additional file 1**

File name: Supplementary Data 1

File format including the three-letter file extension: Word Document (.docx)

Title of data: Survey to international pediatric rheumatologists

Description of data: this data shows the specific questions and answer options for the survey distributed to international pediatric rheumatologists

Cover Letter:

Greetings,

We kindly request your help with our CARRA-funded project that aims to improve our ability to treat and manage patients with juvenile systemic sclerosis (JSSc), a disease associated with major morbidity and significant mortality risk. This brief (< 10 min) survey will help us understand the most commonly used assessments and treatments for JSSc and will be used to work towards developing treatment outcome measures as part of a collaborative CARRA-PRES project.

Please complete the survey in the next 2 weeks. We also welcome others to help us with this work.

Best wishes,

Natalia Vasquez-Canizares, Suzanne Li, Clare Pain, Francesco Zulian

Survey Questions:

1. At the end of the survey, you will be asked if you are interested in participating in this project. If you choose to provide contact information such as your name and email address, your survey responses may no longer be anonymous to the researcher. However, no names or identifying information would be included in any publications or presentations based on these data, and your responses to this survey will remain confidential.

- 1. I consent to participate in this survey
  2. I do not consent to participate in this survey: exit

1. Where do you practice?
   1. Country
   2. State/Province (if applicable)
2. Please indicate your primary role
   1. Attending pediatric rheumatologist
   2. Fellow in rheumatology (including pediatric and combined pediatric/adult programs) - to Q15
   3. Full-time lab researcher (no clinical care) - to Q15
   4. Other (please indicate role) - to Q15
3. How many years have you been in clinical practice [post fellowship]?
   1. 1-5
   2. 6-10
   3. 11-15
   4. >15
   5. N/A

For the following questions, we wish to identify the total number of JSSc patients followed at your center. So, please consider if you and the other pediatric rheumatologists at your center SHARE or individually follow JSSc patients.

- If you and your colleagues SHARE patients, then please have ONLY ONE person (above fellowship level) from your site fill out this survey.
- If you and your colleagues individually follow your OWN patients, then you and your colleagues should EACH fill out this survey.

1. Do you individually follow JSSc patients at your center?
   1. Yes
   2. No
2. How many JSSc patients are CURRENTLY seen by you/pediatric rheumatologists at your center? Please provide your best estimate of # ____
3. How many JSSc patients have you personally followed in the **past 5 years**? Please provide your best estimate of # ____
4. What percent of your JSSc patients in the **past 5 years** do you estimate have/had lung disease? Specify % ______
5. Please indicate how frequently you use the following pulmonary assessment tools in your JSSc patients

|  | Always  (80-100% | Often  (50-79%) | Sometimes (30-49%) | Rarely  (1-19%) | Never/Not Available |
| --- | --- | --- | --- | --- | --- |
| Chest X-ray |  |  |  |  |  |
| High resolution computed tomography (HRCT) |  |  |  |  |  |
| Simple spirometry (without TLC or DLCO) |  |  |  |  |  |
| Full PFT (including TLC and DLCO) |  |  |  |  |  |
| 6-minute walk test |  |  |  |  |  |
| Cardiopulmonary stress test |  |  |  |  |  |
| Other (specify) |  |  |  |  |  |
| *TLC=total lung capacity, DLCO= Diffusing capacity for carbon monoxide, PFT=pulmonary function test | | | | | |

1. Please rank 1-4 (1-5 if including "other") how important these measurements are to you for evaluating lung status/progression in JSSc, where 1 is the most important item.

|  | 1 | 2 | 3 | 4 | 5 | N/A |
| --- | --- | --- | --- | --- | --- | --- |
| Diffusing capacity for carbon monoxide (DLCO) |  |  |  |  |  |  |
| Forced expiratory volume (FEV1) |  |  |  |  |  |  |
| Forced vital capacity (FVC) |  |  |  |  |  |  |
| Total lung capacity (TLC) |  |  |  |  |  |  |
| Other (specify) |  |  |  |  |  |  |

1. What percent of your JSSc patients in the **past 5 years** do you estimate have/had cardiac involvement? Specify %____
2. Please indicate how frequently you use the following cardiac assessment tools in your JSSc patients

|  | Always  (80-100% | Often  (50-79%) | Sometimes (30-49%) | Rarely  (1-19%) | Never/Not Available |
| --- | --- | --- | --- | --- | --- |
| Electrocardiogram (EKG) |  |  |  |  |  |
| Echocardiogram |  |  |  |  |  |
| Holter monitoring |  |  |  |  |  |
| Cardiac stress test |  |  |  |  |  |
| Cardiac magnetic resonance imaging (MRI) |  |  |  |  |  |
| Magnetic resonance angiogram (MRA) |  |  |  |  |  |
| Cardiac catheterization |  |  |  |  |  |
| Other (specify) |  |  |  |  |  |

1. Please rank 1-7 (1-8 if including "other") how important these tools are to you for evaluating cardiac status/progression in JSSc, where 1 is the most important item

|  | 1 | 2 | 3 | 4 | 5 | 6 | 7 | 8 | N/A |
| --- | --- | --- | --- | --- | --- | --- | --- | --- | --- |
| Electrocardiogram (EKG) |  |  |  |  |  |  |  |  |  |
| Echocardiogram |  |  |  |  |  |  |  |  |  |
| Holter monitoring |  |  |  |  |  |  |  |  |  |
| Cardiac stress test |  |  |  |  |  |  |  |  |  |
| Cardiac magnetic resonance imaging (MRI) |  |  |  |  |  |  |  |  |  |
| Magnetic resonance angiogram (MRA) |  |  |  |  |  |  |  |  |  |
| Cardiac catheterization |  |  |  |  |  |  |  |  |  |
| Other (specify) |  |  |  |  |  |  |  |  |  |

1. Please indicate how often you have treated your JSSc patients (current or in the past) with the following therapies:

|  | Always  (80-100% | Often  (50-79%) | Sometimes (30-49%) | Rarely  (1-19%) | Never/Not Available |
| --- | --- | --- | --- | --- | --- |
| Prednisone/prednisolone |  |  |  |  |  |
| Intravenous methylprednisolone pulse dosing (15-30 mg/kg/dose) |  |  |  |  |  |
| Methotrexate |  |  |  |  |  |
| Mycophenolate mofetil |  |  |  |  |  |
| Cyclophosphamide |  |  |  |  |  |
| Rituximab or other B cell depleting treatment |  |  |  |  |  |
| Tocilizumab |  |  |  |  |  |
| Abatacept |  |  |  |  |  |
| Bone marrow transplant |  |  |  |  |  |
| Other (specify) |  |  |  |  |  |

1. Thank you for answering this survey. Would you be interested in further helping or collaborating on this study?
   1. Yes: Q16
   2. No: exit
   3. Maybe, would like to receive more information: Q17
2. Please indicate the activities you would be interested in collaborating with (select all of interest)
   1. Helping with organ specific literature review (through use of Covidence software)
   2. Generating organ-specific survey questions (for Qualtrics)
   3. Answering organ-specific surveys
   4. Participating in consensus meetings
   5. Other: please specify
3. Please provide your name and email so we can contact you. If you have questions, or would like to discuss further, please email Natalia Vasquez-Canizares (PI) at [navasque@montefiore.org](mailto:navasque@montefiore.org).
   1. Name
   2. Email
   3. Questions or comments

**II – Additional file 2**

File name: Supplementary Data 2

File format including the three-letter file extension: Word Document (.docx)

Title of data: Scoping review search terms

Description of data: this data shows the search terms used in each database for the scoping literature review

PubMed:

("scleroderma, systemic"[MeSH Terms] OR "systemic scleroderma"[Title/Abstract] OR "systemic sclerosis"[Title/Abstract] OR "juvenile scleroderma"[Title/Abstract]) AND ((("randomized controlled trial"[Publication Type] OR "controlled clinical trial"[Publication Type] OR "randomized"[Title/Abstract] OR "placebo"[Title/Abstract] OR "drug therapy"[MeSH Subheading] OR "randomly"[Title/Abstract] OR ("trial"[Title/Abstract] OR "groups"[Title/Abstract])) NOT ("animals"[MeSH Terms] NOT "humans"[MeSH Terms])) OR ("cohort studies"[MeSH Terms] OR "cohort study"[Title/Abstract] OR "cross sectional studies"[MeSH Terms] OR "case control studies"[MeSH Terms] OR "control groups"[Title/Abstract] OR ("case*"[Title/Abstract] AND "comparison"[Title/Abstract]) OR ("case*"[Title/Abstract] AND "controlled"[Title/Abstract]) OR ("case*"[Title/Abstract] AND "controls"[Title/Abstract]) OR "Observational Study"[Publication Type] OR "Observational Study"[Title/Abstract])) AND 1994/01/01:2021/12/31[Date - Publication] AND "English"[Language]

Embase:

('systemic sclerosis'/exp OR 'systemic scleroderma':ab,ti OR 'systemic sclerosis':ab,ti OR 'juvenile scleroderma':ab,ti OR 'progressive scleroderma':ab,ti OR 'progressive sclerodermia':ab,ti) AND ('single blind procedure'/exp OR 'single blind procedure' OR 'double blind procedure'/exp OR 'double blind procedure' OR 'crossover procedure'/exp OR 'crossover procedure' OR 'randomized controlled trial'/exp OR 'randomized controlled trial' OR 'controlled clinical trial'/exp OR 'controlled clinical trial' OR 'clinical trial'/exp OR 'clinical trial' OR 'quasi experimental study'/exp OR 'quasi experimental study' OR 'prospective study'/exp OR 'prospective study' OR 'cohort analysis'/exp OR 'observational study'/exp OR random:ab,ti OR randomised:ab,ti OR cohort:ab,ti OR prospective:ab,ti OR longitudinal:ab,ti) AND [english]/lim AND [1994-2021]/py AND [embase]/lim NOT ([embase]/lim AND [medline]/lim)

Web of Science:

TS=(systemic NEAR/2 sclerosis) OR TS=(systemic NEAR/2 scleroderma) OR TS=(juvenile NEAR/2 scleroderma)

Cochrane Central Register of Controlled Trials (CENTRAL):

#1 MeSH descriptor: [Scleroderma, Systemic] explode all trees

#2 systemic sclerosis

#3 juvenile scleroderma

#4 #1 OR #2 OR #3 with Publication Year from 1994 to 2021, in Trials

**III – Additional file 3**

File name: Supplementary Table 1

File format including the three-letter file extension: Word Document (.docx)

Title of data: Use of juvenile systemic sclerosis cardiopulmonary assessment tools by international pediatric rheumatologists stratified by region and GDP per capita

Description of data: the table presents data on the use of various cardiopulmonary assessment tools by pediatric rheumatologists across different regions and Gross Domestic Product (GDP) per capita levels. Numbers in parentheses represent the number of respondents and the percentage of respondents who selected each response option. Statistical significance is indicated by asterisks, with more asterisks indicating a greater level of significance.

| **Use of juvenile systemic sclerosis cardiopulmonary assessment tools by international pediatric rheumatologists stratified by region and GDP per capita** | | | | | | | | |
| --- | --- | --- | --- | --- | --- | --- | --- | --- |
|  |  | **Region** | | | | **GDP per Capita ($INT)** | | |
|  | Overall (n=112)  n (%) | Asia & Africa (n=11) | Latin America  (n=11) | Europe  (n=26) | North America (n=64) | <20k  (n=23) | 20k-49k  (n=19) | >50k  (n=70) |
| **Pulmonary Tools** |  |  |  |  |  |  |  |  |
| Chest X-ray (n=99) |  |  |  |  |  |  |  |  |
| Always | 67 (67.7) | 6 (60) | 8 (88.9) | 14 (60.9) | 39 (68.4) | 16 (80) | 12 (66.7) | 39 (63.9) |
| Often | 16 (16.2) | 0 (0) | 0 (0) | 4 (17.4) | 12 (21.1) | 1 (5) | 3 (16.7) | 12 (19.7) |
| Sometimes | 7 (7.1) | 2 (20) | 0 (0) | 2 (8.7) | 3 (5.3) | 1 (5) | 2 (11.1) | 4 (6.6) |
| Rarely | 6 (6) | 1 (10) | 0 (0) | 3 (13) | 2 (3.5) | 0 (0) | 1 (5.5) | 5 (8.2) |
| Never/Not  available | 3 (3) | 1 (10) | 1 (11.1) | 0 (0) | 1 (1.7) | 2 (10) | 0 (0) | 1 (1.6) |
| HRCT Chest (n=109) |  |  |  |  |  |  |  |  |
| Always | 59 (54.1) | 5 (45.4) | 7 (70) | 17(68) | 30 (47.6) | 14 (63.6) | 14 (73.7) | 31 (45.6) |
| Often | 36 (33.1) | 4 (36.4) | 2 (20) | 6 (24) | 24 (38.1) | 5 (22.7) | 4 (21) | 27 (39.7) |
| Sometimes | 11 (10.1) | 1 (9.1) | 1 (10) | 1 (4) | 8 (12.7) | 2 (9.1) | 1 (5.3) | 8 (11.7) |
| Rarely | 2 (1.8) | 1 (9.1) | 0 (0) | 1 (4) | 0 (0) | 1 (4.6) | 0 (0) | 1 (1.5) |
| Never/Not  available | 1 (0.9) | 0 (0) | 0 (0) | 0 (0) | 1 (1.6) | 0 (0) | 0 (0) | 1 (1.5) |
| Full PFT † (n=108) |  |  |  |  | ******* |  |  | ******* |
| Always | 83 (76.8) | 5 (45.4) | 2 (22.2) | 20 (80) | 56 (88.9) | 8 (38.1) | 16 (84.2) | 59 (86.8) |
| Often | 15 (13.9) | 2 (18.2) | 4 (44.4) | 3 (12) | 6 (9.5) | 6 (28.6) | 2 (10.5) | 7 (10.3) |
| Sometimes | 6 (5.6) | 2 (18.2) | 2 (22.2) | 2 (8) | 0 (0) | 4 (19) | 1 (5.3) | 1 (1.5) |
| Rarely | 0 (0) | 0 (0) | 0 (0) | 0 (0) | 0 (0) | 0 (0) | 0 (0) | 0 (0) |
| Never/Not  available | 4 (3.7) | 2 (18.2) | 1 (11.2) | 0 (0) | 1 (1.6) | 3 (14.3) | 0 (0) | 1 (1.5) |
| 6-Minute Walk Test (n=105) |  |  |  |  | ****** |  |  | ***** |
| Always | 13 (12.4) | 3 (27.3) | 2 (25) | 6 (25) | 2 (3.2) | 6 (30) | 4 (22.2) | 3 (4.5) |
| Often | 20 (19) | 0 (0) | 2 (25) | 4 (16.7) | 14 (22.6) | 3 (15) | 2 (11.1) | 15 (22.4) |
| Sometimes | 24 (22.9) | 4 (36.3) | 2 (25) | 2 (8.3) | 16 (25.8) | 4 (20) | 3 (16.7) | 17 (25.3) |
| Rarely | 25 (23.8) | 1 (9.1) | 1 (12.5) | 10 (41.7) | 13 (21) | 4 (20) | 7 (38.9) | 14 (20.9) |
| Never/Not  available | 23 (21.9) | 3 (27.3) | 1 (12.5) | 2 (8.3) | 17 (27.4) | 3 (15) | 2 (11.1) | 18 (26.9) |
| **Cardiac Tools** |  |  |  |  |  |  |  |  |
| EKG (n=110) |  |  |  |  |  |  |  |  |
| Always | 69 (62.7) | 6 (54.5) | 8 (80) | 21 (84) | 34 (53.1) | 16 (72.7) | 16 (84.2) | 37 (53.6) |
| Often | 22 (20) | 2 (18.2) | 2 (20) | 4 (16) | 14 (21.9) | 3 (13.6) | 3 (15.8) | 16 (23.2) |
| Sometimes | 10 (9.1) | 1 (9.1) | 0 (0) | 0 (0) | 9 (14.1) | 1 (4.5) | 0 (0) | 9 (13) |
| Rarely | 5 (4.5) | 1 (9.1) | 0 (0) | 0 (0) | 4 (6.2) | 1 (4.5) | 0 (0) | 4 (5.8) |
| Never/Not  available | 4 (3.7) | 1 (9.1) | 0 (0) | 0 (0) | 3 (4.7) | 1 (4.5) | 0 (0) | 3 (4.3) |
| Echocardiogram (n=110) |  |  |  |  |  |  |  |  |
| Always | 90 (81.8) | 8 (72.7) | 8 (80) | 21 (84) | 53 (82.8) | 18 (81.8) | 15 (78.9) | 57 (82.6) |
| Often | 15 (13.7) | 2 (18.2) | 2 (20) | 4 (16) | 7 (10.9) | 3 (13.7) | 4 (21.1) | 8 (11.6) |
| Sometimes | 2 (1.8) | 0 (0) | 0 (0) | 0 (0) | 2 (3.1) | 0 (0) | 0 (0) | 2 (2.9) |
| Rarely | 1 (0.9) | 0 (0) | 0 (0) | 0 (0) | 1 (1.6) | 0 (0) | 0 (0) | 1 (1.4) |
| Never/Not  available | 2 (1.8) | 1 (9.1) | 0 (0) | 0 (0) | 1 (1.6) | 1 (4.5) | 0 (0) | 1 (1.4) |
| Holter Monitoring (n=106) |  |  |  |  |  |  |  | ****** |
| Always | 5 (4.7) | 1 (9.1) | 1 (11.1) | 2 (8) | 1 (1.6) | 4 (19.1) | 0 (0) | 1 (1.5) |
| Often | 10 (9.4) | 1 (9.1) | 1 (11.1) | 3 (12) | 5 (8.2) | 3 (14.3) | 2 (10.5) | 5 (7.6) |
| Sometimes | 30 (28.3) | 3 (27.3) | 3 (33.3) | 11 (44) | 13 (21.3) | 5 (23.8) | 11 (57.9) | 14 (21.2) |
| Rarely | 47 (44.3) | 3 (27.3) | 3 (33.3) | 7 (28) | 34 (55.8) | 5 (23.8) | 4 (21.1) | 38 (57.6) |
| Never/Not  available | 14 (13.2) | 3 (27.3) | 1 (11.1) | 2 (8) | 8 (13.1) | 4 (19) | 2 (10.5) | 8 (12.1) |
| Cardiac Stress Test (n=106) |  |  |  |  |  |  |  | ****** |
| Always | 2 (1.9) | 1 (9.1) | 0 (0) | 1 (4) | 0 (0) | 1 (4.8) | 1 (5.3) | 0 (0) |
| Often | 6 (5.6) | 0 (0) | 1 (11.1) | 3 (12) | 2 (3.3) | 2 (9.5) | 1 (5.3) | 3 (4.6) |
| Sometimes | 20 (18.9) | 2 (18.2) | 2 (22.2) | 8 (32) | 8 (13.1) | 3 (14.3) | 9 (47.4) | 8 (12.1) |
| Rarely | 45 (42.4) | 5 (45.4) | 2 (22.2) | 7 (28) | 31 (50.8) | 5 (23.8) | 5 (26.3) | 35 (53) |
| Never/Not  available | 33 (27.3) | 3 (27.3) | 4 (44.4) | 6 (24) | 20 (32.8) | 10 (47.6) | 3 (15.8) | 20 (30.3) |
| Cardiac MRI (n=108) |  |  |  |  |  |  |  |  |
| Always | 1 (0.9) | 1 (9.1) | 0 (0) | 0 (0) | 0 (0) | 1 (4.8) | 0 (0) | 0 (0) |
| Often | 7 (6.5) | 0 (0) | 0 (0) | 3 (12) | 4 (6.3) | 0 (0) | 3 (15.8) | 4 (5.9) |
| Sometimes | 19 (17.6) | 1 (9.1) | 1 (11.1) | 6 (24) | 11 (17.5) | 4 (19) | 4 (21) | 11 (16.2) |
| Rarely | 41 (38) | 3 (27.3) | 4 (44.4) | 11 (44) | 23 (36.5) | 8 (38.1) | 7 (36.9) | 26 (38.2) |
| Never/Not  available | 40 (37) | 6 (54.5) | 4 (44.4) | 5 (20) | 25 (39.7) | 8 (38.1) | 5 (26.3) | 27 (39.7) |
| Cardiac MRA (n=109) |  |  |  |  | ***** |  |  |  |
| Always | 2 (1.8) | 0 (0) | 1 (10) | 0 (0) | 1 (1.6) | 1 (4.5) | 0 (0) | 1 (1.5) |
| Often | 2 (1.8) | 1 (9.1) | 0 (0) | 1 (4) | 0 (0) | 1 (4.5) | 1 (5.3) | 0 (0) |
| Sometimes | 9 (8.3) | 1 (9.1) | 1 (10) | 5 (20) | 2 (3.2) | 2 (9.1) | 4 (21) | 3 (4.4) |
| Rarely | 36 (33) | 3 (27.3) | 5 (50) | 9 (36) | 19 (30.1) | 8 (36.4) | 7 (36.8) | 21 (30.9) |
| Never/Not  available | 60 (55.1) | 6 (54.5) | 3 (30) | 10 (40) | 41 (65.1) | 10 (45.4) | 7 (36.8) | 43 (63.2) |
| Catheterization (n=108) |  |  |  |  | ***** |  |  |  |
| Always | 2 (1.8) | 0 (0) | 1 (10) | 1 (4) | 0 (0) | 1 (4.5) | 1 (5.2) | 0 (0) |
| Often | 1 (0.9) | 0 (0) | 0 (0) | 0 (0) | 1 (1.6) | 0 (0) | 0 (0) | 1 (1.5) |
| Sometimes | 4 (3.7) | 2 (18.2) | 1 (10) | 1 (4) | 0 (0) | 3 (13.7) | 0 (0) | 1 (1.5) |
| Rarely | 40 (37.1) | 3 (27.3) | 5 (50) | 7 (28) | 25 (40.3) | 7 (31.8) | 6 (31.6) | 27 (40.3) |
| Never/Not  available | 61 (56.5) | 6 (54.5) | 3 (30) | 16 (64) | 36 (58.1) | 11 (50) | 12 (63.2) | 38 (56.7) |
| *p<0.05, **p<0.01, ***p<0.001  † Includes spirometry, lung volumes, and diffusion capacity  Abbreviations: DLCO=diffusion capacity of the lungs for carbon monoxide, EKG=electrocardiogram, GDP=gross domestic product, HRCT=high-resolution computed tomography, INT=international dollar, MRA=magnetic resonance angiography, MRI=magnetic resonance imaging, PFT=pulmonary function test | | | | | | | | |

**IV – Additional file 4**

File name: Supplementary Table 2

File format including the three-letter file extension: Word Document (.docx)

Title of data: Use of different juvenile systemic sclerosis treatments by international pediatric rheumatologists stratified by number of patients followed and GDP per capita

Description of data: the table presents data on the use of various treatments in juvenile systemic sclerosis by pediatric rheumatologists across different regions and Gross Domestic Product (GDP) per capita levels. Numbers in parentheses represent the number of respondents and the percentage of respondents who selected each response option. Statistical significance is indicated by asterisks, with more asterisks indicating a greater level of significance.

| **Use of different juvenile systemic sclerosis treatments by international pediatric rheumatologists stratified by number of patients followed and GDP per capita** | | | | | | | |
| --- | --- | --- | --- | --- | --- | --- | --- |
|  | Overall  (n=112)  n (%) | **Number of patients followed per provider** | | | **GDP per capita ($INT)** | | |
| ≤5  (n=83) | 6-10  (n=15) | ≥11  (n=13) | <20.000  (n=23) | 20.000-49.000  (n=19) | >50.000  (n=70) |
| **Steroids** |  |  |  |  |  |  |  |
| Oral (n=107) |  |  |  |  |  |  | ******* |
| Always | 50 (46.7) | 34 (43) | 6 (40) | 10 (76.9) | 16 (72.7) | 16 (84.2) | 18 (27.3) |
| Often | 29 (27.1) | 22 (27.9) | 5 (33.3) | 2 (15.4) | 3 (9.1) | 3 (15.8) | 24 (36.4) |
| Sometimes | 14 (13.1) | 11 (13.9) | 3 (20) | 0 (0) | 2 (13.6) | 0 (0) | 9 (16.7) |
| Rarely | 10 (9.4) | 8 (10.1) | 1 (6.7) | 1 (7.7) | 1 (4.5) | 0 (0) | 11 (13.7) |
| Never/Not available | 4 (3.7) | 4 (5.1) | 0 (0) | 0 (0) | 0 (0) | 0 (0) | 4 (6.1) |
| IVMP pulse (n=108) |  |  |  |  |  |  |  |
| Always | 23 (21.3) | 15 (18.7) | 3 (20) | 5 (38.4) | 7 (31.8) | 5 (26.3) | 11 (16.4) |
| Often | 11 (10.2) | 8 (10) | 2 (13.3) | 1 (7.7) | 4 (18.2) | 1 (5.2) | 6 (9) |
| Sometimes | 28 (25.9) | 19 (23.8) | 6 (40) | 3 (23.1) | 7 (31.8) | 9 (47.4) | 12 (17.9) |
| Rarely | 26 (24.1) | 20 (25) | 3 (20) | 3 (23.1) | 3 (13.6) | 1 (5.3) | 22 (32.8) |
| Never/Not available | 20 (18.5) | 18 (22.5) | 1 (6.7) | 1 (7.7) | 1 (4.5) | 3 (15.8) | 16 (23.9) |
| **DMARDs** |  |  |  |  |  |  |  |
| MTX (n=108) |  |  |  | ***** |  |  |  |
| Always | 40 (37) | 23 (28.8) | 6 (40) | 11 (84.6) | 14 (63.7) | 7 (36.8) | 19 (28.4) |
| Often | 42 (38.9) | 36 (45) | 5 (33.3) | 1 (7.7) | 5 (22.7) | 8 (42.1) | 29 (43.3) |
| Sometimes | 16 (14.8) | 12 (15) | 3 (20) | 1 (7.7) | 2 (9.1) | 4 (21) | 10 (14.9) |
| Rarely | 7 (6.5) | 6 (7.5) | 1 (6.7) | 0 (0) | 1 (4.5) | 0 (0) | 6 (8.9) |
| Never/Not available | 3 (2.8) | 3 (3.7) | 0 (0) | 0 (0) | 0 (0) | 0 (0) | 3 (4.5) |
| MMF (n=106) |  |  |  |  |  |  |  |
| Always | 31 (29.3) | 25 (32) | 3 (20) | 3 (23.1) | 14 (63.6) | 7 (36.8) | 19 (28.3) |
| Often | 48 (45.3) | 34 (43.6) | 8 (53.3) | 6 (46.1) | 5 (22.7) | 8 (42.1) | 29 (43.3) |
| Sometimes | 21 (19.8) | 15 (19.2) | 3 (20) | 3 (23.1) | 2 (9.1) | 4 (21.1) | 10 (14.9) |
| Rarely | 3 (2.8) | 2 (2.6) | 0 (0) | 1 (7.7) | 1 (4.6) | 0 (0) | 6 (9) |
| Never/Not available | 3 (2.8) | 2 (2.6) | 1 (6.7) | 0 (0) | 0 (0) | 0 (0) | 3 (4.5) |
| CYC (n=107) |  |  |  |  |  |  | ****** |
| Always | 5 (4.7) | 2 (2.5) | 2 (13.3) | 1 (7.7) | 3 (14.3) | 0 (0) | 2 (3) |
| Often | 24 (22.4) | 17 (21.5) | 1 (6.7) | 6 (46.1) | 10 (47.6) | 4 (21) | 10 (14.9) |
| Sometimes | 34 (31.8) | 25 (31.7) | 4 (26.7) | 5 (38.5) | 6 (28.5) | 8 (42.1) | 20 (29.9) |
| Rarely | 27 (25.2) | 21 (26.6) | 5 (33.3) | 1 (7.7) | 1 (4.8) | 5 (26.3) | 21 (31.3) |
| Never/Not available | 17 (15.9) | 14 (17.7) | 3 (20) | 0 (0) | 1 (4.8) | 2 (10.6) | 14 (20.9) |
| **Biologics** |  |  |  |  |  |  |  |
| Rituximab (n=107) |  |  |  |  |  |  |  |
| Always | 2 (1.9) | 1 (1.3) | 0 (0) | 1 (7.7) | 0 (0) | 1 (5.3) | 1 (1.5) |
| Often | 12 (11.2) | 9 (11.4) | 0 (0) | 3 (23.1) | 2 (9.5) | 1 (5.3) | 9 (13.4) |
| Sometimes | 24 (22.4) | 20 (25.3) | 2 (13.3) | 2 (15.4) | 5 (23.8) | 4 (21) | 15 (22.4) |
| Rarely | 29 (27.1) | 20 (25.3) | 6 (40) | 3 (23.1) | 5 (23.8) | 8 (42.1) | 16 (23.9) |
| Never/Not available | 40 (37.4) | 29 (36.7) | 7 (46.7) | 4 (30.7) | 9 (42.9) | 5 (26.3) | 26 (38.8) |
| Tocilizumab (n=107) |  |  |  | ***** |  |  |  |
| Always | 4 (3.7) | 2 (2.5) | 0 (0) | 2 (15.4) | 0 (0) | 1 (5.3) | 3 (4.5) |
| Often | 9 (8.4) | 8 (10.1) | 0 (0) | 1 (7.7) | 1 (4.7) | 2 (10.5) | 6 (9) |
| Sometimes | 22 (20.6) | 17 (21.5) | 2 (13.3) | 3 (23.1) | 6 (28.6) | 4 (21) | 12 (17.9) |
| Rarely | 21 (19.6) | 10 (12.7) | 6 (40) | 5 (38.4) | 5 (23.8) | 5 (26.3) | 11 (16.4) |
| Never/Not available | 51 (47.7) | 42 (53.2) | 7 (46.7) | 2 (15.4) | 9 (42.9) | 7 (36.9) | 35 (52.2) |
| Abatacept (n=107) |  |  |  |  |  |  |  |
| Always | 0 (0) | 0 (0) | 0 (0) | 0 (0) | 0 (0) | 0 (0) | 0 (0) |
| Often | 2 (1.9) | 0 (0) | 1 (6.7) | 1 (7.7) | 1 (4.8) | 0 (0) | 1 (1.5) |
| Sometimes | 10 (9.3) | 8 (10.1) | 1 (6.7) | 1 (7.7) | 2 (9.5) | 0 (0) | 8 (11.9) |
| Rarely | 18 (16.8) | 12 (15.2) | 3 (20) | 3 (23.1) | 2 (9.5) | 3 (15.8) | 13 (19.4) |
| Never/Not available | 77 (72) | 59 (74.7) | 10 (66.6) | 8 (61.5) | 19 (76.2) | 16 (84.2) | 45 (67.2) |
| BMT (n=107) |  |  |  |  |  |  |  |
| Always | 0 (0) | 0 (0) | 0 (0) | 0 (0) | 0 (0) | 0 (0) | 0 (0) |
| Often | 0 (0) | 0 (0) | 0 (0) | 0 (0) | 0 (0) | 0 (0) | 0 (0) |
| Sometimes | 2 (1.9) | 1 (1.3) | 1 (6.7) | 0 (0) | 0 (0) | 0 (0) | 2 (3) |
| Rarely | 12 (11.2) | 6 (7.60) | 2 (13.3) | 4 (30.7) | 3 (14.3) | 3 (15.8) | 6 (8.9) |
| Never/Not available | 93 (86.9) | 72 (91.1) | 12 (80) | 9 (69.3) | 18 (85.7) | 16 (84.2) | 59 (88.1) |
| *p<0.05, **p<0.01, ***p<0.001  Abbreviations: BMT=bone marrow transplant, CYC=cyclophosphamide, DMARDs=disease modifying antirheumatic drugs, GDP=gross domestic product, INT=international dollar, IVMP= intravenous methylprednisolone, MMF=mycophenolate mofetil, MTX=methotrexate | | | | | | | |

**V – Additional file 5**

File name: Supplementary Table 3

File format including the three-letter file extension: Word Document (.docx)

Title of data: Use of juvenile systemic sclerosis cardiopulmonary assessment tools by international pediatric rheumatologists stratified by years of practice

Description of data: the table presents data on the use of various cardiopulmonary assessment tools by pediatric rheumatologists stratified by years of practice. Numbers in parentheses represent the number of respondents and the percentage of respondents who selected each response option.

| **Use of juvenile systemic sclerosis cardiopulmonary assessment tools by international pediatric rheumatologists stratified by years of practice** | | | | | |
| --- | --- | --- | --- | --- | --- |
|  | Overall | 1-5 years | 6-10 years | 11-15 years | >15 years |
| **Pulmonary Tools** |  |  |  |  |  |
| Chest X-ray (n=97) |  |  |  |  |  |
| Always | 66 (68) | 9 (52.9) | 14 (66.7) | 14 (77.8) | 29 (70.7) |
| Often | 16 (16.5) | 7 (41.2) | 3 (14.3) | 2 (11.1) | 4 (9.8) |
| Sometimes | 6 (6.2) | 0 (0) | 3 (14.3) | 0 (0) | 3 (7.3) |
| Rarely | 6 (6.2) | 1 (5.9) | 0 (0) | 2 (11.1) | 3 (7.3) |
| Never/Not  available | 3 (3.1) | 0 (0) | 1 (4.7) | 0 (0) | 2 (4.9) |
| HRCT Chest (n=107) |  |  |  |  |  |
| Always | 58 (54.2) | 8 (44.4) | 12 (54.6) | 9 (47.4) | 29 (60.4) |
| Often | 35 (32.7) | 7 (38.9) | 7 (31.8) | 10 (52.6) | 11 (22.9) |
| Sometimes | 11 (10.3) | 3 (16.7) | 2 (9.1) | 0 (0) | 6 (12.5) |
| Rarely | 2 (1.9) | 0 (0) | 0 (0) | 0 (0) | 2 (4.2) |
| Never/Not  available | 1 (0.9) | 0 (0) | 1 (4.5) | 0 (0) | 0 (0) |
| PFT + DLCO (n=106) |  |  |  |  |  |
| Always | 81 (76.4) | 14 (77.8) | 17 (77.3) | 17 (89.5) | 33 (70.2) |
| Often | 15 (14.1) | 3 (16.7) | 1 (4.5) | 2 (10.5) | 9 (19.2) |
| Sometimes | 6 (5.7) | 1 (5.5) | 1 (4.5) | 0 (0) | 4 (8.5) |
| Rarely | 0 (0) | 0 (0) | 0 (0) | 0 (0) | 0 (0) |
| Never/Not  available | 4 (3.8) | 0 (0) | 3 (13.7) | 0 (0) | 1 (2.1) |
| 6-Minute Walk Test (n=103) |  |  |  |  |  |
| Always | 13 (12.6) | 0 (0) | 1 (4.5) | 3 (15.8) | 9 (20.4) |
| Often | 20 (19.4) | 3 (16.7) | 3 (13.6) | 6 (31.6) | 8 (18.2) |
| Sometimes | 24 (23.3) | 5 (27.7) | 6 (27.3) | 3 (15.8) | 10 (22.7) |
| Rarely | 24 (23.3) | 3 (16.7) | 9 (40.9) | 5 (26.3) | 7 (15.9) |
| Never/Not  available | 22 (21.4) | 7 (38.9) | 3 (13.6) | 2 (10.5) | 10 (22.7) |
| **Cardiac Tools** |  |  |  |  |  |
| EKG (n=108) |  |  |  |  |  |
| Always | 69 (63.9) | 7 (38.9) | 15 (68.2) | 14 (73.7) | 33 (67.4) |
| Often | 21 (19.4) | 5 (27.8) | 4 (18.2) | 4 (21) | 8 (16.3) |
| Sometimes | 10 (9.3) | 3 (16.7) | 2 (9.1) | 0 (0) | 5 (10.2) |
| Rarely | 4 (3.7) | 1 (5.6) | 0 (0) | 1 (5.3) | 2 (4.1) |
| Never/Not  available | 4 (3.7) | 2 (11) | 1 (4.5) | 0 (0) | 1 (2) |
| Echocardiogram (n=108) |  |  |  |  |  |
| Always | 89 (82.4) | 14 (77.8) | 19 (86.4) | 15 (79) | 41 (83.7) |
| Often | 15 (13.9) | 3 (16.7) | 1 (4.5) | 4 (21) | 7 (14.3) |
| Sometimes | 2 (1.8) | 1 (5.5) | 1 (4.5) | 0 (0) | 0 (0) |
| Rarely | 0 (0) | 0 (0) | 0 (0) | 0 (0) | 0 (0) |
| Never/Not  available | 2 (1.8) | 0 (0) | 1 (4.5) | 0 (0) | 1 (2) |
| Holter Monitoring (n=104) |  |  |  |  |  |
| Always | 5 (4.8) | 0 (0) | 1 (4.8) | 1 (5.3) | 3 (6.5) |
| Often | 10 (9.6) | 0 (0) | 1 (4.8) | 4 (21) | 5 (10.9) |
| Sometimes | 30 (28.9) | 2 (11.1) | 7 (33.3) | 7 (36.8) | 14 (30.4) |
| Rarely | 46 (44.2) | 11 (61.1) | 8 (38.1) | 6 (31.6) | 21 (45.6) |
| Never/Not  available | 13 (12.5) | 5 (27.8) | 4 (19) | 1 (5.3) | 3 (6.5) |
| Cardiac Stress Test (n=104) |  |  |  |  |  |
| Always | 2 (1.9) | 0 (0) | 0 (0) | 0 (0) | 2 (4.3) |
| Often | 6 (5.8) | 0 (0) | 0 (0) | 2 (10.5) | 4 (8.7) |
| Sometimes | 20 (19.2) | 0 (0) | 5 (22.7) | 6 (31.6) | 9 (19.6) |
| Rarely | 44 (42.3) | 11 (64.7) | 9 (40.9) | 8 (42.1) | 16 (34.8) |
| Never/Not  available | 32 (30.8) | 3 (35.3) | 8 (36.4) | 3 (15.8) | 15 (32.6) |
| Cardiac MRI (n=106) |  |  |  |  |  |
| Always | 1 (0.9) | 0 (0) | 0 (0) | 0 (0) | 1 (2.1) |
| Often | 7 (6.6) | 1 (5.6) | 2 (9.1) | 1 (5.3) | 3 (6.4) |
| Sometimes | 19 (17.9) | 2 (11.1) | 4 (18.2) | 4 (21) | 9 (19.1) |
| Rarely | 40 (37.7) | 6 (33.3) | 4 (18.2) | 10 (52.6) | 20 (42.5) |
| Never/Not  available | 39 (36.8) | 9 (50) | 12 (54.5) | 4 (21) | 14 (29.8) |
| Cardiac MRA (n=107) |  |  |  |  |  |
| Always | 2 (1.9) | 1 (5.5) | 0 (0) | 0 (0) | 1 (2) |
| Often | 2 (1.9) | 0 (0) | 0 (0) | 0 (0) | 2 (4.1) |
| Sometimes | 9 (8.4) | 1 (5.5) | 1 (4.8) | 2 (10.5) | 5 (10.2) |
| Rarely | 35 (32.7) | 3 (16.7) | 7 (33.3) | 7 (36.8) | 18 (36.7) |
| Never/Not  available | 59 (55.1) | 13 (72.2) | 13 (61.9) | 10 (52.6) | 23 (46.9) |
| Catheterization (n=106) |  |  |  |  |  |
| Always | 2 (1.9) | 0 (0) | 0 (0) | 0 (0) | 2 (4.2) |
| Often | 1 (0.9) | 0 (0) | 0 (0) | 1 (5.2) | 0 (0) |
| Sometimes | 4 (3.8) | 0 (0) | 0 (0) | 1 (5.2) | 3 (6.2) |
| Rarely | 39 (36.8) | 6 (33.3) | 8 (38.1) | 8 (42.1) | 17 (35.4) |
| Never/Not  available | 60 (56.6) | 12 (66.7) | 13 (61.9) | 9 (47.4) | 26 (54.2) |
| DLCO: diffusion capacity of the lungs for carbon monoxide, EKG: electrocardiogram, HRCT: high-resolution computed tomography, MRA: magnetic resonance angiography, MRI: magnetic resonance imaging, PFT: pulmonary function test | | | | | |

**VI – Additional file 6**

File name: Supplementary Table 4

File format including the three-letter file extension: Word Document (.docx)

Title of data: Use of different juvenile systemic sclerosis treatments by international pediatric rheumatologists stratified by years of practice

Description of data: the table presents data on the use of various treatments in juvenile systemic sclerosis by pediatric rheumatologists stratified by years of practice. Numbers in parentheses represent the number of respondents and the percentage of respondents who selected each response option. Statistical significance is indicated by an asterisk.

| **Use of different juvenile systemic sclerosis treatments by international pediatric rheumatologists stratified by years of practice** | | | | | |
| --- | --- | --- | --- | --- | --- |
|  | Overall | 1-5 years | 6-10 years | 11-15 years | >15 years |
| **Steroids** |  |  |  |  |  |
| Oral (n=105) |  |  |  |  | * |
| Always | 49 (46.7) | 4 (25) | 10 (47.6) | 13 (68.4) | 22 (44.9) |
| Often | 29 (27.6) | 6 (37.5) | 2 (9.5) | 6 (31.6) | 15 (30.6) |
| Sometimes | 14 (13.3) | 2 (12.5) | 4 (19) | 0 (0) | 8 (16.3) |
| Rarely | 9 (8.6) | 4 (25) | 2 (9.5) | 0 (0) | 3 (6.1) |
| Never/Not available | 4 (3.8) | 0 (0) | 3 (14.3) | 0 (0) | 1 (2) |
| IVMP pulse (n=106) |  |  |  |  |  |
| Always | 22 (20.7) | 2 (11.8) | 5 (22.7) | 4 (21) | 11 (22.9) |
| Often | 11 (10.4) | 1 (5.9) | 2 (9.1) | 3 (15.8) | 5 (10.4) |
| Sometimes | 27 (25.5) | 5 (19.4) | 3 (13.6) | 7 (36.8) | 12 (25) |
| Rarely | 26 (24.5) | 3 (17.6) | 5 (22.7) | 4 (21) | 14 (29.2) |
| Never/Not available | 20 (18.9) | 6 (35.3) | 7 (31.8) | 1 (5.3) | 6 (12.5) |
| **DMARDs** |  |  |  |  |  |
| MTX (n=106) |  |  |  |  |  |
| Always | 38 (35.8) | 5 (29.4) | 8 (36.4) | 6 (31.6) | 19 (39.6) |
| Often | 42 (39.6) | 5 (29.4) | 7 (31.8) | 10 (52.6) | 20 (41.7) |
| Sometimes | 16 (15.1) | 4 (23.5) | 4 (18.2) | 2 (10.5) | 6 (12.5) |
| Rarely | 7 (6.6) | 3 (17.6) | 0 (0) | 1 (5.3) | 3 (6.2) |
| Never/Not available | 3 (2.8) | 0 (0) | 3 (13.6) | 0 (0) | 0 (0) |
| MMF (n=104) |  |  |  |  |  |
| Always | 31 (29.8) | 6 (35.3) | 7 (33.3) | 6 (31.6) | 12 (25.5) |
| Often | 46 (44.2) | 4 (23.5) | 8 (38.1) | 9 (47.4) | 25 (53.2) |
| Sometimes | 21 (20.2) | 7 (41.2) | 4 (19) | 2 (10.5) | 8 (17) |
| Rarely | 3 (2.9) | 0 (0) | 0 (0) | 1 (5.2) | 2 (4.3) |
| Never/Not available | 3 (2.9) | 0 (0) | 2 (9.5) | 1 (5.2) | 0 (0) |
| CYC (n=105) |  |  |  |  |  |
| Always | 5 (4.8) | 1 (5.9) | 1 (4.8) | 1 (5.3) | 2 (4.2) |
| Often | 23 (21.9) | 3 (17.6) | 5 (23.8) | 5 (26.3) | 10 (20.8) |
| Sometimes | 34 (32.4) | 6 (35.3) | 7 (33.3) | 5 (26.3) | 16 (33.3) |
| Rarely | 27 (25.7) | 4 (23.5) | 2 (9.5) | 6 (31.6) | 15 (31.2) |
| Never/Not available | 16 (15.2) | 3 (17.6) | 6 (28.6) | 2 (10.5) | 5 (10.4) |
| **Biologics/Other** |  |  |  |  |  |
| Rituximab (n=105) |  |  |  |  |  |
| Always | 2 (1.9) | 0 (0) | 1 (4.8) | 0 (0) | 1 (2.1) |
| Often | 12 (11.4) | 4 (23.5) | 3 (14.3) | 2 (10.5) | 3 (6.2) |
| Sometimes | 24 (22.9) | 3 (17.6) | 4 (19) | 6 (31.6) | 11 (22.9) |
| Rarely | 28 (26.7) | 2 (11.8) | 4 (19) | 4 (21) | 18 (37.5) |
| Never/Not available | 39 (37.1) | 8 (47.1) | 9 (42.9) | 7 (36.8) | 15 (31.2) |
| Tocilizumab (n=105) |  |  |  |  |  |
| Always | 4 (3.8) | 1 (5.9) | 0 (0) | 0 (0) | 3 (6.2) |
| Often | 9 (8.6) | 3 (17.6) | 1 (4.7) | 2 (10.5) | 3 (6.2) |
| Sometimes | 20 (19) | 4 (23.5) | 3 (14.3) | 4 (21) | 9 (18.8) |
| Rarely | 21 (20) | 0 (0) | 3 (14.3) | 7 (36.8) | 11 (22.9) |
| Never/Not available | 51 (48.6) | 9 (52.9) | 14 (66.7) | 6 (31.6) | 22 (45.8) |
| Abatacept (n=105) |  |  |  |  |  |
| Always | 0 (0) | 0 (0) | 0 (0) | 0 (0) | 0 (0) |
| Often | 1 (0.9) | 0 (0) | 0 (0) | 0 (0) | 1 (2.1) |
| Sometimes | 10 (9.5) | 3 (17.6) | 1 (4.8) | 1 (5.2) | 5 (10.4) |
| Rarely | 18 (17.1) | 2 (11.8) | 4 (19) | 6 (31.6) | 6 (12.5) |
| Never/Not available | 76 (72.4) | 12 (70.6) | 16 (76.2) | 12 (63.2) | 36 (75) |
| BMT (n=105) |  |  |  |  |  |
| Always | 0 (0) | 0 (0) | 0 (0) | 0 (0) | 0 (0) |
| Often | 0 (0) | 0 (0) | 0 (0) | 0 (0) | 0 (0) |
| Sometimes | 2 (1.9) | 0 (0) | 1 (4.7) | 0 (0) | 1 (2.1) |
| Rarely | 12 (11.4) | 0 (0) | 1 (4.7) | 5 (26.3) | 6 (12.5) |
| Never/Not available | 91 (86.7) | 17 (100) | 19 (90.5) | 14 (73.7) | 41 (85.4) |
| *p<0.05  BMT: bone marrow transplant; CYC: cyclophosphamide; DMARDs: disease modifying antirheumatic drugs; IVMP: intravenous methylprednisolone; MMF: mycophenolate mofetil; MTX: methotrexate | | | | | |
